# Supplementary material for: Copy number variation profile in the placental and parental genomes of recurrent pregnancy loss families
Source: PubMed Central journal article supplement (PMC5366903; doi:10.1038/srep45327), 2017-03-27
Supplement: srep45327-s1.pdf [file srep45327-s1.pdf]

## Supplementary Materials

### Copy number variation profile in the placental and parental genomes of recurrent pregnancy loss families

Laura Kasak, MSc<sup>1</sup>, Kristiina Rull, MD, PhD<sup>1,2,3</sup>, Siim Sõber<sup>1,4</sup>, Maris Laan, PhD<sup>1,4\*</sup>

<sup>1</sup>Human Molecular Genetics Research Group, Institute of Molecular and Cell Biology, University of Tartu, Riia 23 St., Tartu 51010, Estonia

<sup>2</sup>Department of Obstetrics and Gynaecology, University of Tartu, Puusepa St. 8, Tartu 51014, Estonia

<sup>3</sup>Women's Clinic of Tartu University Hospital, Puusepa St. 8, Tartu 51014, Estonia

<sup>4</sup>Institute of Biomedicine and Translational Medicine, University of Tartu, Ravila St. 19, Tartu 51014, Estonia

\*Corresponding author: [maris.laan@ut.ee](mailto:maris.laan@ut.ee)

## **SUPPLEMENTARY METHODS**

### **Re-analysis of a subset of RPL patients with a SNP array with increased resolution**

Four RPL couples and two RPL female patients included into the current study had been previously analysed in our seminal report assessing the role of CNVs in predisposing to RPL<sup>1</sup>. As this previous study was based on a lower-resolution SNP array (Illumina Human370CNV-Quad; 370 000 markers) compared to the current study design (Illumina HumanOmniExpress-24-v1 BeadChips; >713 000 markers), these samples were re-genotyped to enable uniform CNV calling of all samples analysed in the current study. Mean spacing between SNPs on the HumanOmniExpress-24-v1 BeadChips (4.0 kb) is nearly twofold shorter compared to Human370CNV-Quad array (7.7 kb). Across 10 analysed parental genomes, 38% of CNVs (16 duplications and 18 deletions) identified in the current study had been also detected by previous analysis using a SNP array with lower resolution. Denser spacing of SNP markers enabled identification of additional 18 duplications and 36 deletions for these 10 RPL patients. Whereas the median length of previously and additionally detected duplication CNVs differed nearly two times (155.5 (range: 45.6 – 655.5) vs 81.7 kb (range: 8.1 – 895.8)), the uncovered additional deletions were substantially shorter than those also detected by the low-resolution array (11.7 (range: 0.6 – 204.2) vs 72.8 kb (range: 0.9 – 563.2)). This confirms that the use of higher density SNP array increases the ability to detect smaller structural genomic variants.

### **RNA-Seq dataset**

The analysed 50 RNA-Seq datasets represent transcriptomes of 10 chorionic villous samples from normal 1<sup>st</sup> trimester electively terminated pregnancies (ETP, n=8) and recurrent pregnancy loss (cases RPL71, RPL89; Supplementary Dataset 1), as well as 40 term gestation placentas. The RNA-Seq datasets have been generated for the same placental samples that

were analysed for their CNV profile in the current study and in the previous report<sup>2</sup>. The detailed description of these RNA-Seq datasets is provided in recent publications from our group focusing on human placental transcriptome in normal and complicated pregnancies<sup>3,4</sup>. In brief, total RNA was extracted from 200–300 mg of homogenized placental tissue using TRIzol reagent (Invitrogen, Life Technologies). The median RIN value for 50 RNA samples was 7.05 (range 5.9-8.9). To produce RNA-Seq libraries total RNA was further purified with RNeasy MinElute columns (Qiagen, Netherlands) according to the manufacturers' protocol. High quality DNA-free total RNA (5 µg) was used for rRNA depletion (Ribo-Zero™ rRNA Removal Kit, Epicentre) and library preparation with cDNA synthesis (Life Technologies) followed by Nextera™ Technology (Illumina). Initial RNA-Seq data analysis and preparation was conducted by the RNA-Seq pipeline v2.4 (Sequencing Unit, FIMM Technology Centre) consisting of FastQC version 0.10.0 for quality control; reads were filtered for adaptor, rRNA and mtDNA sequences as well as homopolymer stretches using custom python scripts. Reads were aligned to human genome assembly (GRCh37.p7/hg19) with TopHat version 2.0.3. Transcript quantification was conducted with Cufflinks v 2.0.2 with reference annotation (measured as FPKM) and gene expression was quantified by htseq-count (as raw read counts). Full clinical details as well as specifics of library preparation, RNA-Seq and basic bioinformatics of raw data are available in<sup>3,4</sup>.

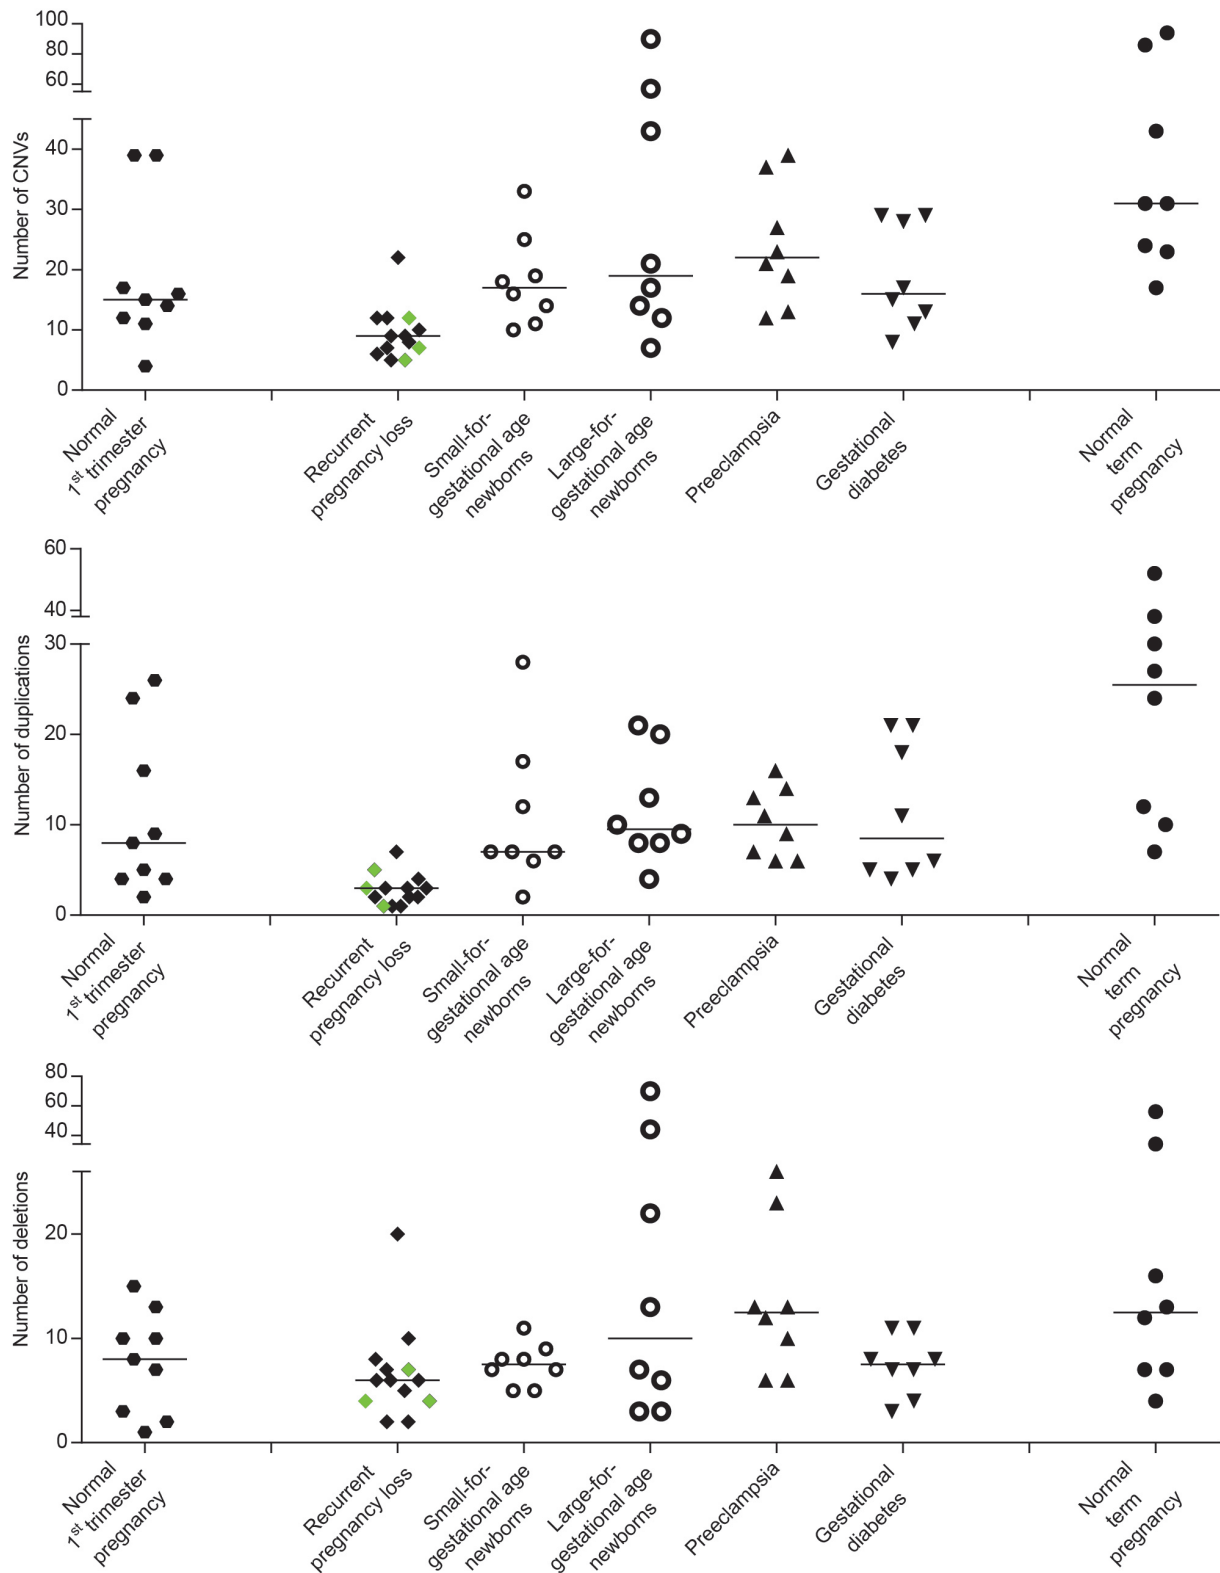

**Supplementary Figure S1. Number of all autosomal CNVs, duplications and deletions in the placental samples of recurrent pregnancy loss (RPL) cases compared to controls representing normal 1<sup>st</sup> trimester, normal term pregnancy and late pregnancy complications (data from<sup>2</sup>). Analysed late pregnancy complications include preeclampsia, gestational diabetes and fetal growth disturbances (small- and large-for gestational age newborns). Placentas from RPL couples eventually succeeding in a term live birth after a successful pregnancy are indicated with green diamonds.**

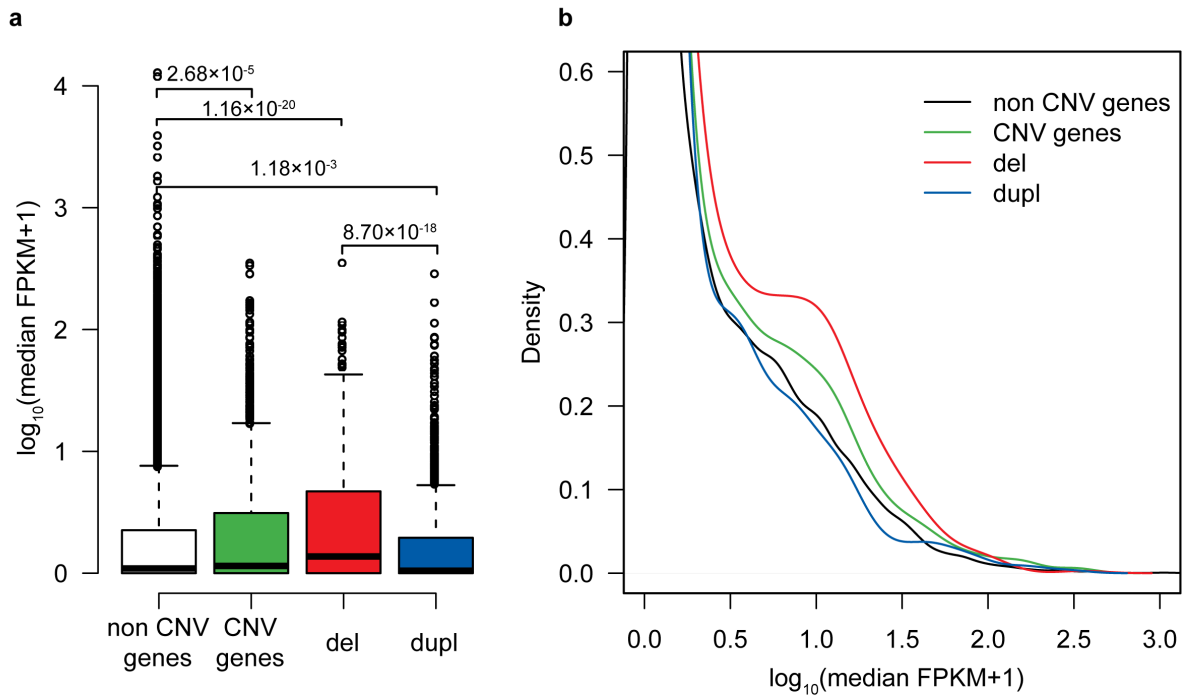

**Supplementary Figure S2. Profiles of median expression values of genes overlapping with CNVs ('CNV genes'; n=2,163) compared to genes not overlapping with CNVs ('non CNV genes'; n=45,266) in placental samples collected at term (n=40; RNA-Seq dataset details in reference<sup>3</sup> and Supplementary Methods). Expression levels are measured as FPKM (fragments per kilobase per million) and distributions are shown as boxplots (a) and plotted density estimates with Gaussian kernel (b). Genes affected only by deletion CNVs (del; n=1,112) and duplication CNVs (dupl; n=1,010) are shown separately. *P*-values for between-group comparisons are derived from Wilcoxon rank sum tests.**

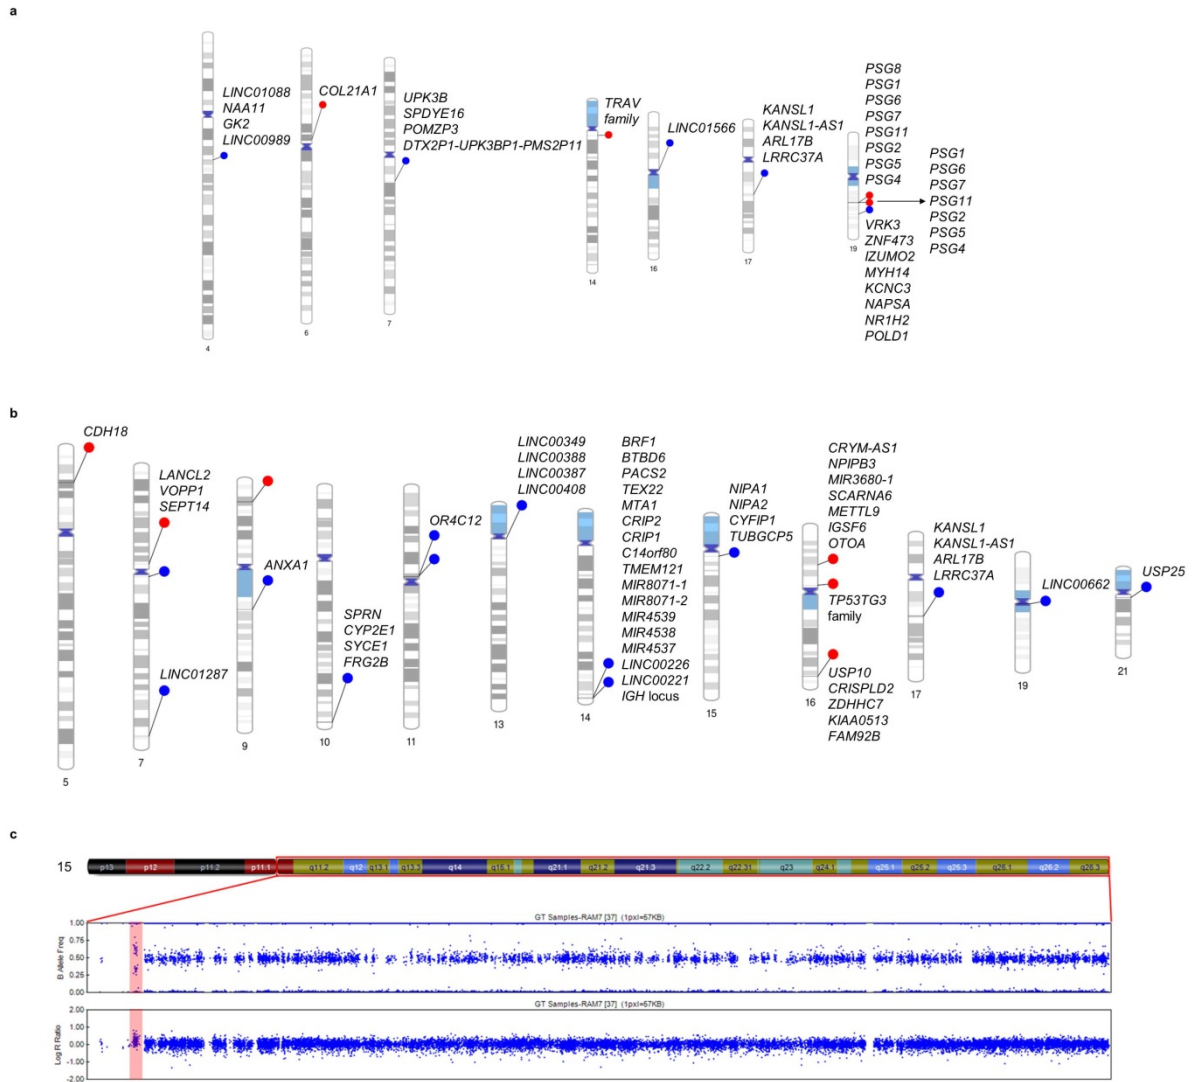

**Supplementary Figure S3. Chromosomal distribution of large, >300 kb autosomal CNVs in the parental genomes of (a) controls and (b) RPL cases.** Dots indicate locations of duplication (blue) and deletion (red) CNVs. Large CNVs in the RPL parental genomes were prevalently (63% of all >300 kb CNVs) pericentromeric or subtelomeric. Control group consists of cases who had normal term pregnancies (n=8) and women who had undergone elective termination of uncomplicated 1<sup>st</sup> trimester pregnancy (n=8). <http://visualization.ritchielab.psu.edu/phenograms/plot>. (c) B allele frequency and Log R ratio graphs for 15q of male partner of the couple RPL7 (Illumina GenomeStudio). Red boxes indicate the duplication CNV at 15q11.2.

**Supplementary Table S1. Comparative profile of placental and parental autosomal CNVs.** Data are given as mean  $\pm$  SD. Group ‘Controls’ for the parental genome analysis consists of couples with normal term pregnancies and women who had undergone elective termination of pregnancy (ETP). Parental and placental datasets for ETP and term pregnancy controls have been derived from<sup>2</sup>. *P*-values for the differences among the groups were calculated by Welch two-sample t-test/Wilcoxon rank sum test. Statistically significant result (*P* < 0.05) compared to <sup>a</sup>1<sup>st</sup> trimester; <sup>b</sup>term placental samples; <sup>c</sup>RPL parental genomes. All, pooled duplication and deletion CNVs; dupl, duplication; del, deletion; RPL, recurrent pregnancy loss.

|                                            |      | Parental genome   |                   | Placental genome                |                               |                                     |                   |
|--------------------------------------------|------|-------------------|-------------------|---------------------------------|-------------------------------|-------------------------------------|-------------------|
|                                            |      | RPL cases         | Controls          | RPL                             | RPL                           | Normal                              | Normal            |
|                                            |      |                   |                   | Pregnancy loss                  | Live birth at term            | 1 <sup>st</sup> trimester pregnancy | Term pregnancy    |
| No of samples                              |      | 25                | 24                | 10                              | 3                             | 9                                   | 8                 |
| No of CNVs per sample                      | all  | 8.8 $\pm$ 5.4     | 9.2 $\pm$ 3.6     | 10.0 $\pm$ 4.8 <sup>ab</sup>    | 8.0 $\pm$ 3.6 <sup>b</sup>    | 18.6 $\pm$ 12.2                     | 43.6 $\pm$ 29.7   |
|                                            | dupl | 3.0 $\pm$ 3.5     | 2.5 $\pm$ 1.5     | 2.8 $\pm$ 1.8 <sup>ab</sup>     | 3.0 $\pm$ 2.0 <sup>ab</sup>   | 10.9 $\pm$ 9.0                      | 25.0 $\pm$ 15.3   |
|                                            | del  | 5.8 $\pm$ 3.0     | 6.6 $\pm$ 2.7     | 7.2 $\pm$ 5.1                   | 5.0 $\pm$ 1.7                 | 7.7 $\pm$ 4.9                       | 18.6 $\pm$ 17.7   |
| Cumulative span of all CNVs per sample, Mb | all  | 0.9 $\pm$ 0.6     | 0.7 $\pm$ 0.5     | 1.1 $\pm$ 1.0 <sup>b</sup>      | 0.8 $\pm$ 0.4 <sup>ab</sup>   | 2.2 $\pm$ 1.5                       | 5.7 $\pm$ 5.2     |
|                                            | dupl | 0.5 $\pm$ 0.5     | 0.4 $\pm$ 0.4     | 0.3 $\pm$ 0.2 <sup>ab</sup>     | 0.3 $\pm$ 0.0 <sup>ab</sup>   | 1.6 $\pm$ 1.1                       | 3.0 $\pm$ 2.0     |
|                                            | del  | 0.4 $\pm$ 0.3     | 0.3 $\pm$ 0.2     | 0.7 $\pm$ 1.0                   | 0.5 $\pm$ 0.4                 | 0.6 $\pm$ 0.6                       | 2.7 $\pm$ 3.7     |
| CNV length across samples, kb              | all  | 97.0 $\pm$ 170.2  | 72.6 $\pm$ 131.5  | 105.5 $\pm$ 150.2 <sup>b</sup>  | 94.6 $\pm$ 147.1 <sup>b</sup> | 119.4 $\pm$ 193.1                   | 130.5 $\pm$ 169.8 |
|                                            | dupl | 160.2 $\pm$ 218.3 | 144.0 $\pm$ 200.9 | 109.9 $\pm$ 106.9               | 91.7 $\pm$ 100.1              | 150.4 $\pm$ 229.4                   | 120.7 $\pm$ 184.5 |
|                                            | del  | 63.7 $\pm$ 127.0  | 45.6 $\pm$ 78.1   | 103.8 $\pm$ 164.6 <sup>bc</sup> | 96.3 $\pm$ 172.7 <sup>b</sup> | 75.5 $\pm$ 112.3                    | 143.5 $\pm$ 147.4 |

**Supplementary Table S2. Copy number variants identified based on Illumina HumanOmniExpress array genotyping and CNV calling in placental (n=13), maternal and paternal blood DNA (n=25).** The analysis included only autosomal CNVs. Genomic coordinates are given according to hg38. Chr, chromosome; Dupl, duplication; Del, deletion.

| Chr | Start (hg38) | End       | Length | Group                       | Type |
|-----|--------------|-----------|--------|-----------------------------|------|
| 1   | 1334343      | 1359943   | 25600  | mother                      | Dupl |
| 1   | 2427505      | 2428542   | 1037   | RPL pregnancy loss placenta | Dupl |
| 1   | 2427505      | 2434877   | 7372   | RPL pregnancy loss placenta | Dupl |
| 1   | 3451579      | 3734754   | 283175 | RPL live birth placenta     | Dupl |
| 1   | 9261182      | 9340809   | 79627  | mother                      | Dupl |
| 1   | 10606460     | 10680569  | 74109  | RPL pregnancy loss placenta | Dupl |
| 1   | 10612878     | 10679198  | 66320  | RPL live birth placenta     | Dupl |
| 1   | 38992187     | 39062399  | 70212  | RPL pregnancy loss placenta | Del  |
| 1   | 70542243     | 70553303  | 11060  | RPL pregnancy loss placenta | Del  |
| 1   | 70542243     | 70553303  | 11060  | father                      | Del  |
| 1   | 70542243     | 70553303  | 11060  | father                      | Del  |
| 1   | 70542243     | 70553303  | 11060  | mother                      | Del  |
| 1   | 84321629     | 84370016  | 48387  | RPL pregnancy loss placenta | Del  |
| 1   | 103611243    | 103613322 | 2079   | RPL live birth placenta     | Del  |
| 1   | 103611243    | 103613322 | 2079   | RPL pregnancy loss placenta | Del  |
| 1   | 103611243    | 103613322 | 2079   | father                      | Del  |
| 1   | 103611243    | 103613322 | 2079   | mother                      | Del  |
| 1   | 103611243    | 103613322 | 2079   | mother                      | Del  |
| 1   | 162762701    | 162769219 | 6518   | mother                      | Del  |
| 1   | 205029247    | 205038822 | 9575   | father                      | Del  |
| 1   | 212465661    | 212487339 | 21678  | RPL pregnancy loss placenta | Del  |
| 1   | 220053390    | 220126693 | 73303  | RPL pregnancy loss placenta | Del  |
| 1   | 224112847    | 224343857 | 231010 | RPL pregnancy loss placenta | Del  |
| 1   | 231573658    | 231677388 | 103730 | father                      | Dupl |
| 1   | 238929939    | 238932730 | 2791   | RPL live birth placenta     | Del  |
| 1   | 248357730    | 248744377 | 386647 | RPL pregnancy loss placenta | Dupl |
| 2   | 1979030      | 1985517   | 6487   | mother                      | Del  |
| 2   | 1979030      | 1985517   | 6487   | mother                      | Del  |
| 2   | 38727987     | 38750470  | 22483  | RPL pregnancy loss placenta | Dupl |
| 2   | 51699461     | 51699766  | 305    | RPL pregnancy loss placenta | Del  |
| 2   | 51699461     | 51699766  | 305    | RPL pregnancy loss placenta | Del  |
| 2   | 51699461     | 51699766  | 305    | father                      | Del  |
| 2   | 52097022     | 52248889  | 151867 | RPL pregnancy loss placenta | Dupl |
| 2   | 57172695     | 57218336  | 45641  | father                      | Dupl |
| 2   | 57172695     | 57256534  | 83839  | father                      | Dupl |
| 2   | 67405082     | 67413146  | 8064   | mother                      | Dupl |
| 2   | 76701093     | 76721975  | 20882  | father                      | Del  |
| 2   | 76713923     | 76721975  | 8052   | mother                      | Del  |
| 2   | 99439044     | 99445701  | 6657   | father                      | Dupl |



| Chr | Start (hg38) | End       | Length | Group                       | Type |
|-----|--------------|-----------|--------|-----------------------------|------|
| 2   | 109720215    | 110222769 | 502554 | RPL live birth placenta     | Del  |
| 2   | 154008968    | 154029732 | 20764  | mother                      | Del  |
| 2   | 168499504    | 168505032 | 5528   | RPL pregnancy loss placenta | Del  |
| 2   | 183933099    | 183937882 | 4783   | RPL live birth placenta     | Del  |
| 2   | 212318971    | 212327544 | 8573   | father                      | Del  |
| 2   | 212322309    | 212325270 | 2961   | father                      | Del  |
| 2   | 212322309    | 212327544 | 5235   | mother                      | Del  |
| 2   | 218378139    | 218385280 | 7141   | RPL pregnancy loss placenta | Del  |
| 2   | 233818079    | 233829877 | 11798  | mother                      | Dupl |
| 2   | 238114887    | 238167171 | 52284  | mother                      | Dupl |
| 2   | 238114887    | 238167171 | 52284  | mother                      | Dupl |
| 2   | 238116989    | 238167171 | 50182  | father                      | Dupl |
| 2   | 238116989    | 238170901 | 53912  | mother                      | Dupl |
| 2   | 238139269    | 238167171 | 27902  | RPL pregnancy loss placenta | Dupl |
| 2   | 238139269    | 238167294 | 28025  | father                      | Dupl |
| 2   | 241931649    | 242106609 | 174960 | father                      | Del  |
| 2   | 241931649    | 242106609 | 174960 | father                      | Del  |
| 2   | 241975583    | 242106609 | 131026 | RPL pregnancy loss placenta | Del  |
| 2   | 241975583    | 242106609 | 131026 | RPL pregnancy loss placenta | Del  |
| 2   | 241975583    | 242106609 | 131026 | mother                      | Del  |
| 2   | 241975583    | 242106609 | 131026 | mother                      | Del  |
| 2   | 241975583    | 242106609 | 131026 | mother                      | Del  |
| 3   | 19817        | 102299    | 82482  | father                      | Dupl |
| 3   | 19817        | 90294     | 70477  | mother                      | Dupl |
| 3   | 1515729      | 1680597   | 164868 | mother                      | Dupl |
| 3   | 1741650      | 1745897   | 4247   | RPL pregnancy loss placenta | Del  |
| 3   | 5349869      | 5396688   | 46819  | RPL pregnancy loss placenta | Del  |
| 3   | 5349869      | 5396688   | 46819  | mother                      | Del  |
| 3   | 5358483      | 5396688   | 38205  | mother                      | Del  |
| 3   | 9321588      | 9325935   | 4347   | father                      | Del  |
| 3   | 58999352     | 59073179  | 73827  | mother                      | Del  |
| 3   | 62972894     | 63007407  | 34513  | mother                      | Del  |
| 3   | 62981195     | 63002132  | 20937  | mother                      | Del  |
| 3   | 65206172     | 65228858  | 22686  | RPL pregnancy loss placenta | Del  |
| 3   | 65206172     | 65228858  | 22686  | father                      | Del  |
| 3   | 65206172     | 65228858  | 22686  | mother                      | Del  |
| 3   | 75339010     | 75587298  | 248288 | mother                      | Del  |
| 3   | 75379524     | 75587298  | 207774 | father                      | Del  |
| 3   | 113857355    | 113901025 | 43670  | mother                      | Del  |
| 3   | 130044038    | 130058958 | 14920  | RPL pregnancy loss placenta | Del  |
| 3   | 130044038    | 130058958 | 14920  | mother                      | Del  |
| 3   | 138088417    | 138099257 | 10840  | RPL pregnancy loss placenta | Dupl |
| 3   | 143447087    | 143476613 | 29526  | father                      | Del  |

| Chr | Start (hg38) | End       | Length | Group                       | Type |
|-----|--------------|-----------|--------|-----------------------------|------|
| 3   | 151770545    | 151828253 | 57708  | mother                      | Del  |
| 3   | 151796802    | 151828253 | 31451  | RPL pregnancy loss placenta | Del  |
| 3   | 151796802    | 151828253 | 31451  | RPL pregnancy loss placenta | Del  |
| 3   | 151796802    | 151828253 | 31451  | father                      | Del  |
| 3   | 151796802    | 151856498 | 59696  | mother                      | Del  |
| 3   | 155752796    | 155800254 | 47458  | father                      | Dupl |
| 3   | 159558237    | 159580247 | 22010  | mother                      | Del  |
| 3   | 162413620    | 162424687 | 11067  | mother                      | Del  |
| 3   | 165323328    | 165350331 | 27003  | mother                      | Del  |
| 3   | 176175294    | 176189554 | 14260  | father                      | Del  |
| 3   | 186668987    | 186715257 | 46270  | RPL pregnancy loss placenta | Del  |
| 3   | 186668987    | 186693287 | 24300  | mother                      | Del  |
| 4   | 1010571      | 1051477   | 40906  | mother                      | Dupl |
| 4   | 2243138      | 2259993   | 16855  | RPL pregnancy loss placenta | Dupl |
| 4   | 2248382      | 2259993   | 11611  | RPL live birth placenta     | Dupl |
| 4   | 3720680      | 3873507   | 152827 | RPL live birth placenta     | Dupl |
| 4   | 9369390      | 9649789   | 280399 | father                      | Dupl |
| 4   | 11545482     | 11640910  | 95428  | mother                      | Del  |
| 4   | 32016212     | 32223858  | 207646 | mother                      | Dupl |
| 4   | 35148038     | 35149615  | 1577   | RPL pregnancy loss placenta | Del  |
| 4   | 35148038     | 35149615  | 1577   | father                      | Del  |
| 4   | 52822821     | 52844661  | 21840  | mother                      | Del  |
| 4   | 63272623     | 63284948  | 12325  | mother                      | Del  |
| 4   | 63272623     | 63284948  | 12325  | mother                      | Del  |
| 4   | 93518875     | 93713151  | 194276 | father                      | Del  |
| 4   | 121364108    | 121367490 | 3382   | father                      | Del  |
| 4   | 160147355    | 160149907 | 2552   | father                      | Del  |
| 4   | 164655588    | 164665848 | 10260  | RPL live birth placenta     | Del  |
| 4   | 164655588    | 164665848 | 10260  | mother                      | Del  |
| 4   | 171616240    | 171630345 | 14105  | RPL pregnancy loss placenta | Del  |
| 5   | 788531       | 840602    | 52071  | mother                      | Del  |
| 5   | 2041551      | 2064855   | 23304  | mother                      | Del  |
| 5   | 7178531      | 7189812   | 11281  | father                      | Del  |
| 5   | 7178531      | 7190961   | 12430  | mother                      | Del  |
| 5   | 7876175      | 7936174   | 59999  | RPL pregnancy loss placenta | Dupl |
| 5   | 8707907      | 8744445   | 36538  | RPL live birth placenta     | Del  |
| 5   | 8707907      | 8743278   | 35371  | mother                      | Del  |
| 5   | 8707907      | 8744445   | 36538  | mother                      | Del  |
| 5   | 18798936     | 18917719  | 118783 | father                      | Dupl |
| 5   | 19932577     | 20248273  | 315696 | father                      | Del  |
| 5   | 20859532     | 20878154  | 18622  | mother                      | Del  |
| 5   | 97712762     | 97781411  | 68649  | RPL live birth placenta     | Del  |
| 5   | 97712762     | 97775819  | 63057  | RPL pregnancy loss placenta | Del  |

| Chr | Start (hg38) | End       | Length | Group                       | Type |
|-----|--------------|-----------|--------|-----------------------------|------|
| 5   | 97712762     | 97763616  | 50854  | father                      | Del  |
| 5   | 97712762     | 97775819  | 63057  | mother                      | Del  |
| 5   | 100051362    | 100055023 | 3661   | mother                      | Del  |
| 5   | 106893823    | 106895197 | 1374   | mother                      | Del  |
| 5   | 106893823    | 106895197 | 1374   | mother                      | Del  |
| 5   | 131681245    | 131740228 | 58983  | RPL live birth placenta     | Del  |
| 5   | 131681245    | 131922685 | 241440 | mother                      | Del  |
| 5   | 139585791    | 139613118 | 27327  | RPL pregnancy loss placenta | Del  |
| 5   | 177812493    | 177949316 | 136823 | mother                      | Del  |
| 5   | 179292363    | 179509721 | 217358 | father                      | Dupl |
| 6   | 4012695      | 4016114   | 3419   | RPL pregnancy loss placenta | Del  |
| 6   | 25320692     | 25330310  | 9618   | mother                      | Del  |
| 6   | 31253262     | 31254137  | 875    | father                      | Del  |
| 6   | 55963929     | 55981729  | 17800  | RPL pregnancy loss placenta | Del  |
| 6   | 55963929     | 55981729  | 17800  | mother                      | Del  |
| 6   | 55963929     | 55981729  | 17800  | mother                      | Del  |
| 6   | 66307601     | 66337401  | 29800  | father                      | Del  |
| 6   | 66307601     | 66337401  | 29800  | father                      | Del  |
| 6   | 74806987     | 74811977  | 4990   | RPL pregnancy loss placenta | Del  |
| 6   | 76606071     | 76617085  | 11014  | mother                      | Del  |
| 6   | 79848763     | 79862766  | 14003  | father                      | Del  |
| 6   | 94228015     | 94355946  | 127931 | RPL pregnancy loss placenta | Del  |
| 6   | 94228015     | 94362201  | 134186 | mother                      | Del  |
| 6   | 98347456     | 98479487  | 132031 | RPL pregnancy loss placenta | Del  |
| 6   | 98371924     | 98466804  | 94880  | mother                      | Del  |
| 6   | 131407118    | 131577068 | 169950 | mother                      | Dupl |
| 6   | 137578655    | 137644281 | 65626  | RPL live birth placenta     | Dupl |
| 7   | 1543652      | 1550807   | 7155   | father                      | Dupl |
| 7   | 17360234     | 17418454  | 58220  | RPL pregnancy loss placenta | Del  |
| 7   | 17386271     | 17418454  | 32183  | mother                      | Del  |
| 7   | 55274956     | 55838203  | 563247 | father                      | Del  |
| 7   | 62583246     | 63238736  | 655490 | father                      | Dupl |
| 7   | 62583246     | 62652633  | 69387  | father                      | Dupl |
| 7   | 105197603    | 105436530 | 238927 | RPL pregnancy loss placenta | Del  |
| 7   | 105307629    | 105637346 | 329717 | RPL pregnancy loss placenta | Del  |
| 7   | 111252170    | 111385477 | 133307 | RPL live birth placenta     | Del  |
| 7   | 111252170    | 111383266 | 131096 | father                      | Del  |
| 7   | 111337288    | 111683743 | 346455 | RPL pregnancy loss placenta | Del  |
| 7   | 111433654    | 111540488 | 106834 | father                      | Del  |
| 7   | 122959245    | 122995119 | 35874  | mother                      | Del  |
| 7   | 132051593    | 132085456 | 33863  | mother                      | Del  |
| 7   | 153245595    | 153834812 | 589217 | mother                      | Dupl |
| 8   | 5741877      | 5747565   | 5688   | RPL pregnancy loss placenta | Del  |

| Chr | Start (hg38) | End       | Length | Group                       | Type |
|-----|--------------|-----------|--------|-----------------------------|------|
| 8   | 5741877      | 5747565   | 5688   | father                      | Del  |
| 8   | 5741877      | 5747565   | 5688   | mother                      | Del  |
| 8   | 5743669      | 5747565   | 3896   | mother                      | Del  |
| 8   | 16090726     | 16172175  | 81449  | RPL pregnancy loss placenta | Del  |
| 8   | 16090726     | 16163959  | 73233  | RPL pregnancy loss placenta | Del  |
| 8   | 16092262     | 16168455  | 76193  | mother                      | Del  |
| 8   | 76676313     | 76713074  | 36761  | mother                      | Del  |
| 8   | 83020549     | 83056421  | 35872  | mother                      | Dupl |
| 8   | 91116612     | 91171430  | 54818  | RPL pregnancy loss placenta | Del  |
| 8   | 91116612     | 91171430  | 54818  | mother                      | Del  |
| 8   | 103411258    | 103416302 | 5044   | mother                      | Del  |
| 8   | 103411258    | 103416302 | 5044   | mother                      | Del  |
| 8   | 103411258    | 103416302 | 5044   | mother                      | Del  |
| 9   | 318153       | 503735    | 185582 | RPL pregnancy loss placenta | Dupl |
| 9   | 318153       | 517715    | 199562 | RPL pregnancy loss placenta | Dupl |
| 9   | 569992       | 594579    | 24587  | RPL pregnancy loss placenta | Del  |
| 9   | 7887951      | 7891408   | 3457   | mother                      | Del  |
| 9   | 11825229     | 12227068  | 401839 | father                      | Del  |
| 9   | 72953887     | 73364757  | 410870 | mother                      | Dupl |
| 9   | 93259834     | 93289897  | 30063  | father                      | Dupl |
| 9   | 126886252    | 126897639 | 11387  | RPL live birth placenta     | Del  |
| 9   | 133204076    | 133210396 | 6320   | mother                      | Del  |
| 9   | 134393077    | 134411093 | 18016  | RPL live birth placenta     | Dupl |
| 9   | 136561760    | 136624513 | 62753  | father                      | Dupl |
| 9   | 136592640    | 136624513 | 31873  | RPL pregnancy loss placenta | Dupl |
| 9   | 136592640    | 136624513 | 31873  | RPL pregnancy loss placenta | Dupl |
| 9   | 136592640    | 136624513 | 31873  | mother                      | Dupl |
| 9   | 136592640    | 136762254 | 169614 | mother                      | Dupl |
| 9   | 136592640    | 136624513 | 31873  | mother                      | Dupl |
| 9   | 136606165    | 136624513 | 18348  | RPL live birth placenta     | Dupl |
| 9   | 136606165    | 136624513 | 18348  | mother                      | Dupl |
| 10  | 21390598     | 21469938  | 79340  | RPL pregnancy loss placenta | Del  |
| 10  | 46172086     | 46332633  | 160547 | RPL pregnancy loss placenta | Dupl |
| 10  | 54161545     | 54229219  | 67674  | mother                      | Del  |
| 10  | 66747663     | 66804808  | 57145  | RPL pregnancy loss placenta | Del  |
| 10  | 66747663     | 66804808  | 57145  | mother                      | Del  |
| 10  | 89184459     | 89185999  | 1540   | RPL live birth placenta     | Del  |
| 10  | 94739953     | 94797579  | 57626  | mother                      | Del  |
| 10  | 105185478    | 105208911 | 23433  | mother                      | Del  |
| 10  | 118826403    | 119033191 | 206788 | RPL live birth placenta     | Dupl |
| 10  | 124609101    | 124723355 | 114254 | RPL pregnancy loss placenta | Dupl |
| 10  | 133421076    | 133563944 | 142868 | father                      | Dupl |
| 10  | 133421076    | 133740558 | 319482 | mother                      | Dupl |

| Chr | Start (hg38) | End       | Length | Group                       | Type |
|-----|--------------|-----------|--------|-----------------------------|------|
| 11  | 892760       | 900809    | 8049   | mother                      | Dupl |
| 11  | 2012869      | 2036417   | 23548  | mother                      | Dupl |
| 11  | 2365406      | 2426625   | 61219  | RPL pregnancy loss placenta | Dupl |
| 11  | 3708446      | 3795547   | 87101  | RPL pregnancy loss placenta | Del  |
| 11  | 3708446      | 3860500   | 152054 | RPL pregnancy loss placenta | Del  |
| 11  | 9163530      | 9518776   | 355246 | RPL pregnancy loss placenta | Del  |
| 11  | 24626779     | 24644439  | 17660  | RPL pregnancy loss placenta | Del  |
| 11  | 46188708     | 46216180  | 27472  | RPL pregnancy loss placenta | Del  |
| 11  | 49955784     | 50709229  | 753445 | mother                      | Dupl |
| 11  | 50098683     | 50709229  | 610546 | mother                      | Dupl |
| 11  | 60095631     | 60100108  | 4477   | RPL pregnancy loss placenta | Del  |
| 11  | 81792950     | 81802672  | 9722   | RPL pregnancy loss placenta | Del  |
| 11  | 81794421     | 81802672  | 8251   | RPL pregnancy loss placenta | Del  |
| 11  | 128653624    | 128666428 | 12804  | RPL pregnancy loss placenta | Del  |
| 12  | 6134991      | 6138398   | 3407   | mother                      | Del  |
| 12  | 7848316      | 7973149   | 124833 | father                      | Dupl |
| 12  | 8876276      | 8896637   | 20361  | RPL pregnancy loss placenta | Del  |
| 12  | 19316386     | 19425173  | 108787 | mother                      | Dupl |
| 12  | 31031418     | 31253973  | 222555 | RPL pregnancy loss placenta | Dupl |
| 12  | 31088411     | 31256645  | 168234 | RPL pregnancy loss placenta | Dupl |
| 12  | 31088411     | 31256844  | 168433 | RPL pregnancy loss placenta | Dupl |
| 12  | 31088411     | 31253973  | 165562 | mother                      | Dupl |
| 12  | 31088411     | 31262057  | 173646 | mother                      | Dupl |
| 12  | 31113353     | 31255762  | 142409 | mother                      | Dupl |
| 12  | 31848581     | 31919612  | 71031  | father                      | Dupl |
| 12  | 49137675     | 49251457  | 113782 | RPL pregnancy loss placenta | Del  |
| 12  | 61703812     | 61714867  | 11055  | father                      | Dupl |
| 12  | 63548869     | 63724778  | 175909 | RPL pregnancy loss placenta | Dupl |
| 12  | 82198117     | 82218638  | 20521  | mother                      | Del  |
| 12  | 99608908     | 99614995  | 6087   | father                      | Del  |
| 12  | 109111774    | 109225776 | 114002 | mother                      | Dupl |
| 12  | 128745968    | 128748468 | 2500   | father                      | Del  |
| 12  | 128745968    | 128748468 | 2500   | mother                      | Del  |
| 13  | 18484577     | 18943280  | 458703 | mother                      | Dupl |
| 13  | 36737194     | 36777619  | 40425  | RPL pregnancy loss placenta | Del  |
| 13  | 36738009     | 36777619  | 39610  | mother                      | Del  |
| 13  | 45605092     | 45641212  | 36120  | mother                      | Del  |
| 13  | 68672890     | 68693849  | 20959  | RPL pregnancy loss placenta | Del  |
| 13  | 68672890     | 68693849  | 20959  | mother                      | Del  |
| 13  | 95284895     | 95380685  | 95790  | father                      | Dupl |
| 13  | 100014379    | 100134403 | 120024 | RPL pregnancy loss placenta | Del  |
| 14  | 22270094     | 22471422  | 201328 | father                      | Del  |
| 14  | 22270094     | 22473900  | 203806 | mother                      | Del  |

| Chr | Start (hg38) | End       | Length  | Group                       | Type |
|-----|--------------|-----------|---------|-----------------------------|------|
| 14  | 22270094     | 22473159  | 203065  | mother                      | Del  |
| 14  | 23960040     | 24014851  | 54811   | mother                      | Del  |
| 14  | 23984157     | 24014851  | 30694   | RPL pregnancy loss placenta | Del  |
| 14  | 23984157     | 24014851  | 30694   | mother                      | Del  |
| 14  | 44719763     | 44740193  | 20430   | RPL pregnancy loss placenta | Del  |
| 14  | 44719763     | 44740193  | 20430   | mother                      | Del  |
| 14  | 49623728     | 49678963  | 55235   | father                      | Dupl |
| 14  | 84582471     | 84606219  | 23748   | father                      | Del  |
| 14  | 85821003     | 85843820  | 22817   | father                      | Del  |
| 14  | 85821003     | 85843820  | 22817   | mother                      | Del  |
| 14  | 87933144     | 87980532  | 47388   | mother                      | Del  |
| 14  | 103595309    | 103642406 | 47097   | RPL pregnancy loss placenta | Del  |
| 14  | 105156924    | 105207355 | 50431   | mother                      | Dupl |
| 14  | 105207888    | 106576619 | 1368731 | mother                      | Dupl |
| 14  | 105581568    | 105884536 | 302968  | mother                      | Dupl |
| 15  | 22584820     | 23122762  | 537942  | father                      | Dupl |
| 15  | 24152472     | 24170857  | 18385   | mother                      | Del  |
| 15  | 25170910     | 25240618  | 69708   | mother                      | Dupl |
| 15  | 43544751     | 43647444  | 102693  | mother                      | Del  |
| 15  | 45066648     | 45102208  | 35560   | mother                      | Del  |
| 15  | 51841717     | 52057158  | 215441  | RPL pregnancy loss placenta | Del  |
| 15  | 57352258     | 57366684  | 14426   | RPL live birth placenta     | Del  |
| 15  | 85968459     | 85977902  | 9443    | mother                      | Del  |
| 16  | 370907       | 377479    | 6572    | mother                      | Dupl |
| 16  | 774098       | 795819    | 21721   | mother                      | Dupl |
| 16  | 1752231      | 1792208   | 39977   | RPL pregnancy loss placenta | Dupl |
| 16  | 1752231      | 1792208   | 39977   | mother                      | Dupl |
| 16  | 1752231      | 1792208   | 39977   | mother                      | Dupl |
| 16  | 21305426     | 21828019  | 522593  | RPL live birth placenta     | Del  |
| 16  | 21305426     | 21828019  | 522593  | father                      | Del  |
| 16  | 32899200     | 33993220  | 1094020 | RPL pregnancy loss placenta | Del  |
| 16  | 32899200     | 33993220  | 1094020 | mother                      | Del  |
| 16  | 35363172     | 35512674  | 149502  | RPL pregnancy loss placenta | Dupl |
| 16  | 35372988     | 35512674  | 139686  | RPL pregnancy loss placenta | Dupl |
| 16  | 57016436     | 57026301  | 9865    | mother                      | Del  |
| 16  | 76886122     | 76981412  | 95290   | mother                      | Del  |
| 16  | 77959610     | 77963812  | 4202    | RPL pregnancy loss placenta | Del  |
| 16  | 79230038     | 79239785  | 9747    | mother                      | Del  |
| 16  | 80857994     | 80910771  | 52777   | RPL live birth placenta     | Del  |
| 16  | 81190041     | 81267966  | 77925   | mother                      | Del  |
| 16  | 84775294     | 85133284  | 357990  | father                      | Del  |
| 16  | 85975035     | 85981113  | 6078    | mother                      | Del  |
| 16  | 88456148     | 88528983  | 72835   | mother                      | Dupl |

| Chr | Start (hg38) | End      | Length | Group                       | Type |
|-----|--------------|----------|--------|-----------------------------|------|
| 16  | 90007593     | 90027787 | 20194  | mother                      | Dupl |
| 17  | 29243604     | 29482086 | 238482 | RPL pregnancy loss placenta | Del  |
| 17  | 37318076     | 37488149 | 170073 | RPL pregnancy loss placenta | Del  |
| 17  | 46092442     | 46272724 | 180282 | father                      | Dupl |
| 17  | 46092442     | 46272724 | 180282 | father                      | Dupl |
| 17  | 46092442     | 46272724 | 180282 | mother                      | Dupl |
| 17  | 46092442     | 46272724 | 180282 | mother                      | Dupl |
| 17  | 46092442     | 46502770 | 410328 | mother                      | Dupl |
| 17  | 46099737     | 46502770 | 403033 | RPL pregnancy loss placenta | Dupl |
| 17  | 75610194     | 75620784 | 10590  | RPL pregnancy loss placenta | Dupl |
| 17  | 77264304     | 77275705 | 11401  | RPL pregnancy loss placenta | Del  |
| 18  | 10918245     | 10919991 | 1746   | father                      | Del  |
| 18  | 44185713     | 44194278 | 8565   | RPL pregnancy loss placenta | Del  |
| 18  | 60038756     | 60040758 | 2002   | father                      | Del  |
| 18  | 69072212     | 69088271 | 16059  | mother                      | Del  |
| 18  | 69077071     | 69088271 | 11200  | father                      | Del  |
| 18  | 69080331     | 69088271 | 7940   | father                      | Del  |
| 18  | 69080331     | 69088271 | 7940   | mother                      | Del  |
| 18  | 69541905     | 69550035 | 8130   | father                      | Del  |
| 19  | 730030       | 757412   | 27382  | RPL pregnancy loss placenta | Dupl |
| 19  | 730030       | 757412   | 27382  | mother                      | Dupl |
| 19  | 8995829      | 9191318  | 195489 | RPL pregnancy loss placenta | Del  |
| 19  | 15653506     | 15654151 | 645    | mother                      | Del  |
| 19  | 27428816     | 27752973 | 324157 | father                      | Dupl |
| 19  | 37034969     | 37043447 | 8478   | mother                      | Del  |
| 19  | 40850846     | 40873243 | 22397  | RPL live birth placenta     | Del  |
| 19  | 41114514     | 41210366 | 95852  | RPL pregnancy loss placenta | Del  |
| 19  | 43055178     | 43553616 | 498438 | RPL pregnancy loss placenta | Del  |
| 19  | 43055178     | 43331618 | 276440 | mother                      | Del  |
| 19  | 46294573     | 46313531 | 18958  | father                      | Del  |
| 19  | 50757732     | 50760253 | 2521   | RPL live birth placenta     | Dupl |
| 19  | 53429042     | 53508130 | 79088  | mother                      | Del  |
| 19  | 54402316     | 54409551 | 7235   | RPL pregnancy loss placenta | Del  |
| 20  | 388261       | 417284   | 29023  | father                      | Dupl |
| 20  | 4905844      | 5060783  | 154939 | RPL pregnancy loss placenta | Del  |
| 20  | 12821422     | 12908666 | 87244  | father                      | Dupl |
| 20  | 15776678     | 15783700 | 7022   | mother                      | Del  |
| 20  | 45252989     | 45272543 | 19554  | mother                      | Del  |
| 20  | 48890385     | 49417294 | 526909 | RPL pregnancy loss placenta | Del  |
| 20  | 63236102     | 63247657 | 11555  | mother                      | Dupl |
| 20  | 63532951     | 63570431 | 37480  | mother                      | Dupl |
| 21  | 15584547     | 15937614 | 353067 | mother                      | Dupl |
| 21  | 19934016     | 19963774 | 29758  | father                      | Del  |

| <b>Chr</b> | <b>Start (hg38)</b> | <b>End</b> | <b>Length</b> | <b>Group</b>                | <b>Type</b> |
|------------|---------------------|------------|---------------|-----------------------------|-------------|
| 21         | 30720114            | 30866332   | 146218        | mother                      | Dupl        |
| 21         | 45504871            | 45533378   | 28507         | RPL pregnancy loss placenta | Dupl        |
| 22         | 25272763            | 25518626   | 245863        | RPL pregnancy loss placenta | Del         |
| 22         | 25275848            | 25518626   | 242778        | RPL pregnancy loss placenta | Del         |



**Supplementary Table S3. Gene enrichment analysis of placental CNVRs.** Gene enrichment analysis implemented in g:Profiler software<sup>5</sup> and a conservative output function ‘Best per parent group (strong)’ was applied. Number of CNVRs entering the test was 339 for the control and 68 for the RPL group-specific analysis. Overrepresented functional categories in GO and TRANSFAC databases with highly significant statistical support are shown ( $P < 1 \times 10^{-2}$ ). RPL, recurrent pregnancy loss; GO, gene ontology; TF, transcription factor binding motif.

| Type                                                                                                | ID       | Name                                          | No of genes in category | No of genes in query | No of common genes | Pathway genes (%) | Query genes (%) | Corrected P-value | Common genes                                                                                                                                                                                                                                                                                                                                                                                                                                                                                                  |
|-----------------------------------------------------------------------------------------------------|----------|-----------------------------------------------|-------------------------|----------------------|--------------------|-------------------|-----------------|-------------------|---------------------------------------------------------------------------------------------------------------------------------------------------------------------------------------------------------------------------------------------------------------------------------------------------------------------------------------------------------------------------------------------------------------------------------------------------------------------------------------------------------------|
| <i>CNVRs only in the placental genomes of control 1<sup>st</sup> trimester and term pregnancies</i> |          |                                               |                         |                      |                    |                   |                 |                   |                                                                                                                                                                                                                                                                                                                                                                                                                                                                                                               |
| GO                                                                                                  | 0019814  | immunoglobulin complex complement activation, | 14                      | 595                  | 7                  | 50                | 1.2             | 2.00E-04          | <i>IGHE, IGHG4, IGHG2, IGHA1, IGHG1, IGHD, IGHV3-23</i>                                                                                                                                                                                                                                                                                                                                                                                                                                                       |
|                                                                                                     | 0006958  | classical pathway                             | 44                      | 595                  | 10                 | 22.7              | 1.7             | 1.94E-03          | <i>C7, C2, IGHE, IGHG4, IGHG2, IGHA1, IGHG1, IGHV3-23, C4B, C4A</i>                                                                                                                                                                                                                                                                                                                                                                                                                                           |
|                                                                                                     | 0034987  | immunoglobulin receptor binding               | 14                      | 595                  | 6                  | 42.9              | 1               | 5.56E-03          | <i>IGHE, IGHG4, IGHG2, IGHA1, IGHG1, IGHV3-23</i>                                                                                                                                                                                                                                                                                                                                                                                                                                                             |
|                                                                                                     | 0006910  | phagocytosis, recognition                     | 22                      | 595                  | 7                  | 31.8              | 1.2             | 8.00E-03          | <i>CD36, IGHE, IGHG4, IGHG2, IGHA1, IGHG1, IGHV3-23</i>                                                                                                                                                                                                                                                                                                                                                                                                                                                       |
| TF                                                                                                  | M00716_1 | ZF5; motif: GSGCGCGR                          | 16480                   | 630                  | 510                | 3.1               | 81              | 3.27E-07          | <i>RAD52, MAD1L1, HOXA11, THSD7A, RPUSD1, RHBDF1, PIGQ, HEATR5B, FYN, ZC3H3, TTC27, PLEKHB1, SPAST, KPNA6, LRRC7, HOXC8, JADE2, CNTLN, EPHA3, KCNQ1, ARID4B, SYNE2, FAM168A, MTA3, CCAR1, VMP1, DGKA, SYT1, INPP5A, MAST4, FGF10, CLTCL1, LIMS2, KCNQ2, SEMA3C, HOXA9, TP73, SMARCA2, ERC1, TRPM3, SLCO1A2, P3H2, RAB11FIP3, AARS, ZC3HC1, TRPM7, SNAP23, MFSD11, MSH2, PRODH, CRYBB2P1, HSCB, XBPI, PPP6R2, POLE2, CHGA, ITPK1, RAE1, PLCB4, RNF125, RIOK3, FGF14, MSLN, PHKB, NPRL3, MPG, NARFL, HAGHL,</i> |

*FAM173A, METRN, STUB1, RHBDL1, CAPN15, ZNF106, MYEF2, SGK3, TRPS1, GSDMD, PYCRL, EEF1D, TUSC3, HOXA1, HOXA2, HOXA3, HOXA5, HOXA6, HOXA13, ZNF862, UBE2R2, RAB11FIP2, FBXL20, TUBD1, KPNB1, RPS6KB1, PIGL, FBXW7, SH3D19, HGFAC, C2CD5, COL12A1, EYA4, LMNB1, SEC24A, TXNDC15, CNTN3, COL7A1, ZBTB47, NKTR, IFIH1, GCA, BIRC6, STRN, PLCL1, COX7A2L, SCP2, WRAP73, TBCE, SIPA1L2, PLPPR4, RSRP1, NSL1, SENP5, YIPF4, EPCAM, FAM45A, NUP43, PCMT1, CRISPLD1, ECHDC2, PSPCI, DPPA4, ZMYM2, TBC1D15, KHDRBS1, TMEM39B, HOXA7, SLC25A16, HOXC13, HOXC11, HOXC12, NCOA3, PEPD, CNOT1, GOT2, KTN1, SGPP1, IDUA, FGFRL1, TMEM175, WFIKKN1, WDR24, FBXL16, CHTF18, GNG13, MTUS1, ITFG1, PHF10, C6ORF203, CYP2E1, C16ORF13, UBE4B, LATS1, UBE2G1, PCBD2, ERAL1, DMGDH, ZMYM5, SRRM1, KRBA1, DPH6, WNT2B, TMEM241, RNF138, WDR36, EPHA7, MRPS9, RAC1, UBAP2, DENND4C, HAUS2, RAB1A, ACTR2, TET1, SPPL2A, CPNE8, MDGA2, WDR89, C14ORF79, RHOT2, NCOR1, PRPSAP2, NPEPPS, PTRH2, GAREM1, CAPN10, CELA2A, NPHP1, GPR17, ANKMY1, ALDH1L1, SLIT2, DGKQ, SLC26A1, RPS3A, BHMT, DDX46, SHPRH, SLC22A3, SNTG1, WHSC1L1, NAPRT, PLIN2, GPR107, ANKRD30A, FRA10AC1, MTG1, NKX6-2, JMY, CCDC50, SAR1B, GGPS1, STK32B, TRAPPC8, PTPRD, CEBPG, PPP2R5E, CHST9, SLFN13, SETD9,*

*MIER3, PSD3, LHFPL4, ATP2B2, DDX19B, ST3GAL2, APPL1, RHPN1, TPRG1L, STARD9, RGS12, CCDC117, ZBTB8A, ZNF208, POLR3K, SNRNP25, PRR35, WDR90, JMJD8, CCDC78, MEIOB, CMPK1, COA7, ZYG11B, PLPP3, GMEB1, LZIC, RBP7, MEGF6, BRINP3, FLVCR1, KIF26B, B3GALNT2, MEMO1, DPY30, ALB, HESX1, LIPH, SENP2, LRPAP1, RAD54L2, TEX264, ABCE1, OTUD4, GRIK2, TXLNB, STXBP5, CAMLG, CSMD3, MICALL2, INTS1, PHAX, ALDH7A1, UBAP1, PHYHIPL, STOX1, C2, CENPV, ATF7IP2, AGBL1, STIM1, RRM1, PRR25, ULK4, ARF4, DDX19A, STXBP6, GRM5, CLIC4, MYRIP, UBB, PYM1, CDCA4, PRKCDBP, KCNG3, ATP6V0E2, COL24A1, SYCE1, CFAP46, TVP23B, FAM195A, PDE3A, SLFN11, HOXC5, ARPP21, FAM222B, KDM2A, RHOD, NMNAT1, GALNTL6, DENND6A, PDE12, LRRC75A-AS1, VCPIPI, MCTP1, MRPL48, RAB6A, ZDHHC21, DOK7, ZBTB8OS, RHOG, TBL1XR1, CASC2, PPP1R42, PARD6G, PLEC, RNF212, FAM220A, MCMDC2, PARP10, GRINA, FAM101A, GAK, PACS2, ABCA13, TIGD5, C12ORF40, FAHD1, PAK2, HOXC9, HOXC10, LRRC57, LRRC75A, ZNF467, ANKRD62, C5ORF24, OR4P4, UNC5C, ZNF804B, SPNS3, TRAK1, MAFA, CRIP2, MTA1, SPNS2, CSMD1, GPR132, DGCR6, CHEK2, NUDT14, PTP4A2, ADRA2C, PKP3, NCMAP, WDR27, KCNH7, BTBD6, JAG2, TMEM121, ROBO2, BRF1, SGCZ, ANO9, C6ORF120, SIGIRR, C14ORF80, ROR1, PRKG1, MYBL1,*

M00803  
\_1

E2F; motif: GGCGSG

14303

630

449

3.1

71.3

2.86E-05

*KATNA1, FNBPI, LUZP2, TRPV2, DUSP28, DPYD, RBM34, MSANTD1, FAT4, LCOR, NCOR2, TMEM26, HTT, SSPO, RAB40C, HOXA4, HOXC6, KLHDC1, DNM3, CYP2A7, QRICH1, HOXC4, FLVCR1-AS1, LRBA, RYR2, LRRTM3, CES1, DCAF12, MIR21, MIR371A, MIR372, MIR373, TATDN3, SPRN, ZYG11A, RUFY2, STK19, DXO, SKIV2L, NELFE, MROH6, ATP6V0E2-AS1, PSG5, RNVU1-17, MIR615, MIR661, MIR662, MIR196B, MIR516A2, MIR559, MIR196A2, MIR527, MIR519A1, PTTG3P, CRIP1, ATF6B, C8ORF44, SCART1, CELA2B, MIR1254-1, MIR1236, C4B, TEX22, TP73-AS1, HOTAIR, LINC01205, CYP21A2, SMIM1, RP11-54515.3, DGCR5, SNORD121B, HOXA11-AS, CEACAMP10, RP11-755B10.3, PSG11, CFB, C4A, MIR4300HG, ALDH1L1-AS2, DPH6-AS1, FGF10-AS1, HOXC13-AS, HOXC-AS2, HOXC-AS1, RP3-513G18.2, HOXC-AS3, AC005355.2, RP11-521B24.3, HOXA10-AS, HOXA10, HOXA-AS3, CYP2A6, NHLRC4, EPPK1, RP11-529K1.2, TCF24, MIR4687, MIR4753, MIR1273F, MIR4655, MIR5697, MIR5708, MIR1273G, MIR5587, MIR5095, MIR3176, CTD-2246P4.1, KCNQ1OT1, C8ORF44-SGK3, DGCR9, ZBTB8B, MIR6765, MIR451B, MIR8071-1, MIR6880, LINC00540, MIR8071-2, SNORD49A, SNORD65, MIR4732, EIF1B-AS1, LINC00254, RAD52, MAD1L1, HOXA11, RPUSD1, RHBDF1, PIGQ, FYN, TTC27, SPAST, KPNA6, LRRC7, HOXC8, JADE2, CNTLN, KCNQ1, ARID4B, SYNE2, SPO11, FAM168A,*

*MTA3, CCAR1, VMP1, DGKA, MTFR1, SYT1, INPP5A, MAST4, CLTCL1, KCNQ2, SEMA3C, HOXA9, TP73, SMARCA2, ERC1, SLCO1A2, P3H2, RAB11FIP3, AARS, ZC3HC1, TRPM7, SNAP23, MFSD11, MSH2, PRODH, CRYBB2P1, HSCB, XBPI, PPP6R2, POLE2, CHGA, ITPK1, RAE1, PLCB4, RNF125, RIOK3, PHKB, NPRL3, MPG, NARFL, HAGHL, FAM173A, METRN, STUB1, RHBDL1, ZNF106, SGK3, ARMC1, TRPS1, PYCRL, EEF1D, TUSC3, HOXA1, HOXA2, HOXA5, HOXA6, HOXA13, UBE2R2, RAB11FIP2, FBXL20, TUBD1, KPNB1, RPS6KB1, PIGL, FBXW7, SH3D19, C2CD5, COL12A1, EYA4, LMNB1, SEC24A, TXNDC15, CNTN3, COL7A1, ZBTB47, NKTR, IFIH1, GCA, BIRC6, STRN, PLCL1, COX7A2L, SCP2, WRAP73, TBCE, SIPA1L2, RSRP1, NSL1, SENP5, YIPF4, EPCAM, FAM45A, NUP43, PCMT1, ECHDC2, PSPC1, DPPA4, ZMYM2, TBC1D15, KHDRBS1, TMEM39B, HOXA7, SLC25A16, HOXC13, HOXC12, NCOA3, CNOT1, GOT2, KTN1, SGPP1, IDUA, FGFRL1, TMEM175, WFIKKN1, WDR24, FBXL16, CHTF18, MTUS1, ITFG1, PHF10, C6ORF203, CYP2E1, C16ORF13, UBE4B, LATS1, UBE2G1, PCBD2, ERAL1, DMGDH, ZMYM5, SRRM1, KRBA1, DPH6, TMEM241, RNF138, EPHA7, MRPS9, RAC1, UBAP2, DENND4C, HAUS2, RAB1A, ACTR2, TET1, DNA2, SPPL2A, CPNE8, MDGA2, WDR89, C14ORF79, RHOT2, NCOR1, PRPSAP2, NPEPPS, PTRH2, GAREM1, CELA2A, ANKMY1, ALDH1L1, SLIT2, DGKQ,*

*SLC26A1, RPS3A, BHMT, DDX46, SHPRH, SLC22A3, SNTG1, WHSC1L1, NAPRT, PLIN2, GPR107, ANKRD30A, MTG1, NKX6-2, ANK3, JMY, SLC30A6, SAR1B, GGPS1, STK32B, TRAPPC8, PTPRD, CEBPG, CHST9, SLFN13, SETD9, MIER3, PSD3, LHFPL4, ATP2B2, DDX19B, ST3GAL2, APPL1, RHPN1, TPRG1L, STARD9, RGS12, CCDC117, ZBTB8A, ZNF208, POLR3K, SNRNP25, PRR35, WDR90, JMJD8, CCDC78, MEIOB, CMPK1, COA7, ZYG11B, PLPP3, GMEB1, LZIC, RBP7, MEGF6, FLVCR1, KIF26B, B3GALNT2, MEMO1, DPY30, DPPA2, ALB, HESX1, LIPH, SENP2, LRPAP1, RAD54L2, TEX264, OTUD4, STXBP5, CAMLG, CSMD3, MICALL2, INTS1, PHAX, ALDH7A1, UBAP1, PHYHIPL, STOX1, C2, CENPV, ATF7IP2, STIM1, RRM1, PRR25, ULK4, ARF4, DDX19A, STXBP6, GRM5, CLIC4, MYRIP, UBB, PYM1, CDCA4, PRKCDBP, KCNG3, ATP6V0E2, COL24A1, SYCE1, CFAP46, TVP23B, FAM195A, PDE3A, HOXC5, ARPP21, FAM222B, KDM2A, RHOD, NMNAT1, TOMM20, GALNTL6, DENND6A, PDE12, DNAH12, LRRC75A-AS1, VCIPI1, MCTP1, MRPL48, RAB6A, ZDHHC21, DOK7, ZBTB8OS, RHOG, TBLIXR1, CASC2, PPP1R42, PARD6G, PLEC, RNF212, FAM220A, MCMDC2, GRINA, FAM101A, GAK, EDC3, PACS2, ABCA13, TIGD5, C12ORF40, FAHD1, PAK2, HOXC9, HOXC10, LRRC57, LRRC75A, C5ORF24, UNC5C, ZNF804B, SPNS3, TRAK1, MAFA, CRIP2, MTA1, SPNS2, CSMD1, GPR132,*

|        |                 |       |     |     |     |      |          |                                                                                                                                                                                                                                                                 |                                                                                                                                                                                                                                                                                                                                                                                                                                                                                                                                                                                                                                                                                                                                                                                                                                                                                                                                                                                                          |
|--------|-----------------|-------|-----|-----|-----|------|----------|-----------------------------------------------------------------------------------------------------------------------------------------------------------------------------------------------------------------------------------------------------------------|----------------------------------------------------------------------------------------------------------------------------------------------------------------------------------------------------------------------------------------------------------------------------------------------------------------------------------------------------------------------------------------------------------------------------------------------------------------------------------------------------------------------------------------------------------------------------------------------------------------------------------------------------------------------------------------------------------------------------------------------------------------------------------------------------------------------------------------------------------------------------------------------------------------------------------------------------------------------------------------------------------|
|        |                 |       |     |     |     |      |          |                                                                                                                                                                                                                                                                 | <p><i>DGCR6, CHEK2, NUDT14, PTP4A2, ADRA2C, PKP3, NCMAP, WDR27, BTBD6, JAG2, TMEM121, BRF1, SGCZ, ANO9, C6ORF120, SIGIRR, C14ORF80, ROR1, PRKG1, MYBL1, KATNA1, QRFPR, FNBP1, LUZP2, TRPV2, DUSP28, DPYD, RBM34, FAT4, LCOR, NCOR2, TMEM26, HTT, RAB40C, HOXA4, HOXC6, KLHDC1, DNMT3, QRICH1, HOXC4, FLVCRI-AS1, LRBA, RYR2, MIR21, MIR371A, MIR372, MIR373, TATDN3, SPRN, ZYG11A, RUFY2, STK19, DXO, SKIV2L, NELFE, ATP6V0E2-AS1, SNORA14B, RNVU1-17, MIR615, MIR661, MIR662, MIR196B, MIR559, MIR196A2, MIR527, CRIP1, ATF6B, C8ORF44, CELA2B, MIR1236, MIR1283-2, TEX22, TP73-AS1, C4B-AS1, AC073283.4, SMIM1, RP11-54515.3, DGCR5, SNORD121B, SNORD121A, HOXA11-AS, CEACAMP10, RP11-755B10.3, ALDH1L1-AS2, DPH6-AS1, HOXC13-AS, HOXC-AS2, HOXC-AS1, HOXC-AS3, RP11-521B24.3, HOXA10-AS, HOXA10, NHLRC4, EPPK1, RP11-529K1.2, TCF24, MIR4687, MIR1273F, MIR4655, MIR5697, MIR5095, KCNQ1OT1, C8ORF44-SGK3, DGCR9, ZBTB8B, MIR6765, MIR6880, SNORD49A, MIR6817, EIF1B-AS1, LINC00254, SNORA50A</i></p> |
| M01177 | SREBP-2; motif: | 13504 | 630 | 420 | 3.1 | 66.7 | 1.47E-03 | <p><i>MAD1L1, HOXA11, RPUSD1, RHBDF1, FYN, ZC3H3, PLEKHB1, SPAST, KPNA6, LRRC7, HOXC8, JADE2, KCNQ1, ARID4B, SYNE2, FAM168A, MTA3, CCAR1, VMP1, DGKA, MTFR1, SYT1, FGF10, KCNQ2, TP73, SMARCA2, FYB, P3H2, RAB11FIP3, AARS, NLRC4, TRPM7, MFSD11, MSH2,</i></p> |                                                                                                                                                                                                                                                                                                                                                                                                                                                                                                                                                                                                                                                                                                                                                                                                                                                                                                                                                                                                          |
| _1     | NNGYCACNNSMN    |       |     |     |     |      |          |                                                                                                                                                                                                                                                                 |                                                                                                                                                                                                                                                                                                                                                                                                                                                                                                                                                                                                                                                                                                                                                                                                                                                                                                                                                                                                          |

*PRODH, CRYBB2P1, POLE2, CHGA, ITPK1, PLCB4, RNF125, RIOK3, FGF14, MSLN, PHKB, SLC38A7, NPRL3, NARFL, HAGHL, FAM173A, METRN, STUB1, RHBDL1, CAPN15, SGK3, ARMC1, GSDMD, PYCRL, EEFD, HOXA1, HOXA2, HOXA5, HOXA6, HOXA13, ZNF862, UBE2R2, TUBD1, KPNB1, RPS6KB1, PIGL, FBXW7, SH3D19, HGFAC, C2CD5, EYA4, LMNB1, NR3C1, SEC24A, TXNDC15, CNTN3, KNG1, COL7A1, ZBTB47, NKTR, BIRC6, SCP2, TBCE, SIPA1L2, NSL1, SENP5, YIPF4, EPCAM, FAM45A, PCMT1, ECHDC2, PSPCI, DPPA4, ZMYM2, KHDRBS1, TMEM39B, HOXA7, SLC25A16, HOXC13, HOXC11, HOXC12, NCOA3, PEPD, PSG8, CNOT1, GOT2, MED1, SGPP1, IDUA, FGFRL1, WFIKKN1, WDR24, FBXL16, CHTF18, GNG13, MTUS1, ITFG1, PHF10, CYP2E1, C16ORF13, LATS1, UBE2G1, PCBD2, ERAL1, ZMYM5, TMEM241, EPHA7, RAC1, UBAP2, DENND4C, HAUS2, RAB1A, ACTR2, TET1, DNA2, SPPL2A, CPNE8, WDR89, C14ORF79, RHOT2, PRPSAP2, PTRH2, GAREM1, CAPN10, NLRP12, CELA2A, NPHP1, GPR17, ALDH1L1, VPRBP, SLIT2, DGKQ, SLC26A1, DDX46, SLC22A3, SNTG1, WHSC1L1, NAPRT, GPR107, ANKRD30A, FAM13C, MTG1, NKX6-2, PCDH15, JMY, OLAH, SLC30A6, SAR1B, GGPS1, STK32B, TRAPPC8, CEBPG, PPP2R5E, CHST9, MIER3, PSD3, LHFPL4, ATP2B2, DDX19B, APPL1, RHPN1, TPRG1L, RGS12, CCDC117, ZBTB8A, POLR3K, SNRNP25, PRR35,*



*WDR90, JMJD8, CCDC78, MEIOB, COA7, ZYG11B, PLPP3, GMEB1, LZIC, RBP7, MEGF6, CCDC27, BRINP3, FLVCRI, KIF26B, B3GALNT2, MEMO1, DPY30, DPPA2, HESX1, SENP2, LRPAP1, RAD54L2, TEX264, ABCE1, OTUD4, PAPD4, STXBP5, CAMLG, MICALL2, UBAP1, STOX1, C2, CENPV, ATF7IP2, AGBL1, STIM1, RRM1, PRR25, ULK4, ARF4, DDX19A, STXBP6, MYO7B, MYRIP, UBB, CDCA4, PSG6, PRKCDBP, KCNG3, ATP6V0E2, COL24A1, SYCE1, CFAP46, TVP23B, SLFN12, FAM195A, HOXC5, ARPP21, KDM2A, RHOD, NMNAT1, TOMM20, DNAH12, LRRC75A-AS1, VCPIP1, MCTP1, MRPL48, RAB6A, DOK7, ZBTB8OS, RHOG, PPP1R42, PARD6G, PLEC, FAM220A, MCMDC2, PARP10, GRINA, FAM101A, EDC3, PACS2, TIGD5, FAHD1, PAK2, HOXC10, LRRC57, ZNF467, ANKRD62, C5ORF24, UNC5C, TRAK1, MAFA, CRIP2, MTA1, CSMD1, GPR132, DGCR6, NUDT14, PTP4A2, ADRA2C, PKP3, NCMAP, KCNH7, BTBD6, JAG2, TMEM121, BRF1, SIGIRR, C14ORF80, ROR1, SPATA45, PRKG1, KATNA1, QRFPR, RHD, FNBP1, TRPV2, SLC24A5, RBM34, MSANTD1, LCOR, NCOR2, TEX43, TMEM26, HTT, SSPO, RAB40C, HOXA4, HOXC6, DNM3, CYP2A7, QRICHI, HOXC4, FLVCRI-AS1, LRBA, CES1, MIR21, MIR371A, MIR372, MIR373, TATDN3, SPRN, ZYG11A, RUFY2, STK19, DXO, MROH6, ATP6V0E2-AS1, PSG5, SNORA14B, RNVU1-17, MIR615, MIR661, MIR662, MIR196B, MIR516A2, MIR551A,*

|        |                                      |      |     |     |     |      |          |                                                                                                                                                                                                                                                                                                                                                                                                                                                                                                                                                                                                                                                                                                                                                                                                                                                                                                                                                                                                                                                                                                                                                                                                                                                       |
|--------|--------------------------------------|------|-----|-----|-----|------|----------|-------------------------------------------------------------------------------------------------------------------------------------------------------------------------------------------------------------------------------------------------------------------------------------------------------------------------------------------------------------------------------------------------------------------------------------------------------------------------------------------------------------------------------------------------------------------------------------------------------------------------------------------------------------------------------------------------------------------------------------------------------------------------------------------------------------------------------------------------------------------------------------------------------------------------------------------------------------------------------------------------------------------------------------------------------------------------------------------------------------------------------------------------------------------------------------------------------------------------------------------------------|
| M07231 | TFAP2A; motif:<br>_0 NNNNGCCYSAGGGCA | 2513 | 630 | 106 | 4.2 | 16.8 | 2.38E-03 | <p><i>MIR559, MIR196A2, MIR527, MIR519A1, PTTG3P, CRIP1, C8ORF44, RP11-1023L17.2, CELA2B, MIR1288, MIR1283-2, C4B, LINC01087, TEX22, TP73-AS1, HOTAIR, LINC01205, C4B-AS1, CYP21A2, SMIMI, LINC00993, CDKN2AIPNL, DGCR5, SNORD121B, MIR2053, SNORD121A, ASB14, HOXA11-AS, CEACAMP10, PSG2, PSG11, C4A, ALDH1L1-AS2, FGF10-AS1, HOXC13-AS, RP3-513G18.2, HOXC-AS3, AC005355.2, RP11-521B24.3, HOXA10-AS, HOXA10, CYP2A6, NHLRC4, EPPK1, RP11-529K1.2, MIR4687, MIR4753, MIR1273F, MIR4655, MIR5697, MIR5708, MIR1273G, MIR5587, MIR5585, MIR3176, KCNQ1OT1, C8ORF44-SGK3, DGCR9, ZBTB8B, MIR6765, MIR451B, MIR8071-1, MIR6880, MIR8071-2, SNORD49A, SNORD65, MIR4732, EIF1B-AS1, LINC00254, SNORA50A</i></p> <p><i>RAD52, RPUSD1, PIGQ, ZC3H3, HOXC8, KCNQ1, SPO11, KCNQ2, ERC1, CAPN15, GSDMD, PYCRL, HOXA3, HOXA5, KPNB1, HGFAC, EYA4, KNG1, COL7A1, SCP2, RSRP1, YIPF4, CRISPLD1, ZMYM2, KTN1, FGFRL1, WDR24, CHTF18, C16ORF13, ZMYM5, DENND4C, CPNE8, RHOT2, ANKMY1, DGKQ, SLC26A1, MTG1, SLC30A6, PSD3, ATP2B2, ST3GAL2, RGS12, WDR90, JMJD8, CMPK1, LZIC, MEGF6, MEMO1, LRPAP1, TXLNB, CSMD3, INTS1, PHYHIPL, PRR25, CLIC4, CDCA4, PSG6, PRKCDBP, SYCE1, FAM195A, PDE3A, FAM222B, NMNAT1, ZDHHC21, DOK7, PPP1R42, PLEC, PARP10, LRRC75A,</i></p> |
|--------|--------------------------------------|------|-----|-----|-----|------|----------|-------------------------------------------------------------------------------------------------------------------------------------------------------------------------------------------------------------------------------------------------------------------------------------------------------------------------------------------------------------------------------------------------------------------------------------------------------------------------------------------------------------------------------------------------------------------------------------------------------------------------------------------------------------------------------------------------------------------------------------------------------------------------------------------------------------------------------------------------------------------------------------------------------------------------------------------------------------------------------------------------------------------------------------------------------------------------------------------------------------------------------------------------------------------------------------------------------------------------------------------------------|

|    |                                                                         |                                                                        |     |     |    |      |      |          |                                                                                                                                                                                                                                                                                                          |
|----|-------------------------------------------------------------------------|------------------------------------------------------------------------|-----|-----|----|------|------|----------|----------------------------------------------------------------------------------------------------------------------------------------------------------------------------------------------------------------------------------------------------------------------------------------------------------|
|    |                                                                         |                                                                        |     |     |    |      |      |          | ZNF467, PSG9, NUDT14, ADRA2C, NCMAP, TMEM121, C14ORF80, RHD, TRPV2, DUSP28, MSANTD1, SSPO, CYP2A7, CES1, DCAF12, ZYG11A, PSG5, MIR661, MIR662, CRIP1, C4B, LINC01087, PSG1, SMIMI, PSG2, PSG11, PSG4, C4A, LINC00536, RP11-215P8.4, RP11-521B24.3, HOXA-AS3, NHLRC4, MIR1273F, MIR4655, MIR3176, MIR6765 |
|    | M01588                                                                  | GKLF; motif:                                                           | 183 | 630 | 18 | 9.8  | 2.9  | 3.79E-03 | RPUSD1, PIGQ, FAM173A, STRN, NCOA3, CHTF18, CYP2E1, PRPSAP2, DPPA2, PACS2, CRIP2, SPNS2, NUDT14, PTP4A2, C14ORF80, MIR661, RP3-513G18.2, NHLRC4                                                                                                                                                          |
|    | _1                                                                      | GCCMCRCNNN                                                             |     |     |    |      |      |          |                                                                                                                                                                                                                                                                                                          |
|    | M06621                                                                  | ZNF479; motif:                                                         | 17  | 630 | 6  | 35.3 | 1    | 5.78E-03 | PIGQ, PYCRL, SCP2, C14ORF79, PARP10, NHLRC4                                                                                                                                                                                                                                                              |
|    | _1                                                                      | NSKACAAAMAGC                                                           |     |     |    |      |      |          |                                                                                                                                                                                                                                                                                                          |
|    | <i>CNVs only in the placental genomes of miscarried RPL pregnancies</i> |                                                                        |     |     |    |      |      |          |                                                                                                                                                                                                                                                                                                          |
|    | 0050911                                                                 | detection of chemical stimulus involved in sensory perception of smell | 408 | 110 | 19 | 4.7  | 17.3 | 3.84E-09 | OR7G1, OR7G3, OR7G2, OR1M1, OR2T1, OR2T35, OR2T29, OR2T11, OR2T34, OR2T10, OR2T27, OR7D2, OR2G6, OR14I1, OR2T2, OR2T3, OR2T4, OR2T6, OR2T5                                                                                                                                                               |
| GO | 0004984                                                                 | olfactory receptor activity                                            | 408 | 110 | 19 | 4.7  | 17.3 | 3.84E-09 | OR7G1, OR7G3, OR7G2, OR1M1, OR2T1, OR2T35, OR2T29, OR2T11, OR2T34, OR2T10, OR2T27, OR7D2, OR2G6, OR14I1, OR2T2, OR2T3, OR2T4, OR2T6, OR2T5                                                                                                                                                               |
|    | 0004930                                                                 | G-protein coupled receptor activity                                    | 867 | 110 | 19 | 2.2  | 17.3 | 9.55E-04 | OR7G1, OR7G3, OR7G2, OR1M1, OR2T1, OR2T35, OR2T29, OR2T11, OR2T34, OR2T10, OR2T27, OR7D2, OR2G6, OR14I1, OR2T2, OR2T3, OR2T4, OR2T6, OR2T5                                                                                                                                                               |

**Supplementary Table S4. Summary of FPKM values for ‘CNV genes’ compared to ‘non CNV genes’.** See details for the definitions in Methods.

| <b>ALL SAMPLES</b>   |                  |             |                                |               |             |                                |             |
|----------------------|------------------|-------------|--------------------------------|---------------|-------------|--------------------------------|-------------|
| <b>Gene group</b>    | <b>genes (n)</b> | <b>Min.</b> | <b>1<sup>st</sup> Quartile</b> | <b>Median</b> | <b>Mean</b> | <b>3<sup>rd</sup> Quartile</b> | <b>Max.</b> |
| nonCNV               | 45,156           | 0           | 0                              | 0.0938        | 4.37        | 1.27                           | 13460       |
| CNV                  | 2,273            | 0           | 0                              | 0.1511        | 4.42        | 2.08                           | 340.4       |
| del+dupl             | 62               | 0           | 0                              | 0.0661        | 23.71       | 1.06                           | 340.4       |
| del                  | 1,148            | 0           | 0                              | 0.3413        | 4.71        | 3.55                           | 306.7       |
| dupl                 | 1,063            | 0           | 0                              | 0.0489        | 2.98        | 0.96                           | 277         |
| <b>TERM PLACENTA</b> |                  |             |                                |               |             |                                |             |
| <b>Gene group</b>    | <b>genes (n)</b> | <b>Min.</b> | <b>1<sup>st</sup> Quartile</b> | <b>Median</b> | <b>Mean</b> | <b>3<sup>rd</sup> Quartile</b> | <b>Max.</b> |
| nonCNV               | 45,266           | 0           | 0                              | 0.0946        | 4.32        | 1.25                           | 13060       |
| CNV                  | 2,163            | 0           | 0                              | 0.1523        | 4.46        | 2.16                           | 356.8       |
| del+dupl             | 41               | 0           | 0                              | 0.0350        | 34.99       | 1.49                           | 340.4       |
| del                  | 1,112            | 0           | 0                              | 0.3707        | 4.63        | 3.69                           | 356.8       |
| dupl                 | 1,010            | 0           | 0                              | 0.0479        | 3.02        | 0.95                           | 290.9       |

*Note:*

Analysis for the effect of CNVs on the expression of the involved genes was conducted in parallel for all placental samples with available RNA-Seq data<sup>3,4</sup> (n=50) and separately in term pregnancy samples<sup>3</sup> (n=40) only. The analysis was restricted to the genes having concordant id in Ensembl v67 and Ensembl v87 (n=47,429). Start and end coordinates (hg38) of CNV regions (n=1,257 across all samples; n=1094 in term samples) were compared to gene coordinates from Ensembl v87. Genes with any overlap with CNV regions were classified as ‘CNV genes’ (n=2,273 in all samples; n=2,163 in term samples). ‘CNV genes’ were subdivided as genes present only in deletion CNVs (del; n=1,148 in all samples; n=1,112 in term samples), present only in duplication CNVs (dupl; n=1,063 all samples; n=1,010 term samples). Genes detected in both deletion and duplication CNVs (n=62 all samples; n=41 term samples) were not analysed separately due to their small number. Median FPKM (fragments per kilobase per million) values in all samples and term samples were extracted for each gene.

**Supplementary Table S5. Copy number variants identified in RPL family trios with a term live birth after a successful pregnancy.** Genomic coordinates are given according to hg38. The analysis included only autosomal CNVs. Chr, chromosome; Del, deletion, Dupl, duplication; n.a., not applicable. Large pericentromeric/subtelomeric CNVs are shown in **bold font**.

| Chr       | Start (hg38)     | End              | Length         | Sample              | Type        | Inherited/somatic in the placental genome |
|-----------|------------------|------------------|----------------|---------------------|-------------|-------------------------------------------|
| 1         | 103611243        | 103613322        | 2,079          | RPL11 placenta      | Del         | somatic                                   |
| 1         | 162762701        | 162769219        | 6,518          | RPL11 mother        | Del         | n.a.                                      |
| 1         | 231573658        | 231677388        | 103,730        | RPL11 father        | Dupl        | n.a.                                      |
| 1         | 238929939        | 238932730        | 2,791          | RPL11 placenta      | Del         | somatic                                   |
| 2         | 57172695         | 57218336         | 45,641         | RPL11 father        | Dupl        | n.a.                                      |
| 2         | 212322309        | 212325270        | 2,961          | RPL11 father        | Del         | n.a.                                      |
| 2         | 241975583        | 242106609        | 131,026        | RPL11 mother        | Del         | n.a.                                      |
| 3         | 19817            | 90294            | 70,477         | RPL11 mother        | Dupl        | n.a.                                      |
| 3         | 1515729          | 1680597          | 164,868        | RPL11 mother        | Dupl        | n.a.                                      |
| 4         | 164655588        | 164665848        | 10,260         | RPL11 placenta      | Del         | somatic                                   |
| 5         | 788531           | 840602           | 52,071         | RPL11 mother        | Del         | n.a.                                      |
| 6         | 137578655        | 137644281        | 65,626         | RPL11 placenta      | Dupl        | somatic                                   |
| <b>7</b>  | <b>55274956</b>  | <b>55838203</b>  | <b>563,247</b> | <b>RPL11 father</b> | <b>Del</b>  | <b>n.a.</b>                               |
| 8         | 5743669          | 5747565          | 3,896          | RPL11 mother        | Del         | n.a.                                      |
| 9         | 7887951          | 7891408          | 3,457          | RPL11 mother        | Del         | n.a.                                      |
| 10        | 118826403        | 119033191        | 206,788        | RPL11 placenta      | Dupl        | somatic                                   |
| <b>13</b> | <b>18484577</b>  | <b>18943280</b>  | <b>458,703</b> | <b>RPL11 mother</b> | <b>Dupl</b> | <b>n.a.</b>                               |
| 13        | 95284895         | 95380685         | 95,790         | RPL11 father        | Dupl        | n.a.                                      |
| 14        | 23960040         | 24014851         | 54,811         | RPL11 mother        | Del         | n.a.                                      |
| <b>14</b> | <b>105581568</b> | <b>105884536</b> | <b>302,968</b> | <b>RPL11 mother</b> | <b>Dupl</b> | <b>n.a.</b>                               |
| 15        | 24152472         | 24170857         | 18,385         | RPL11 mother        | Del         | n.a.                                      |
| 15        | 57352258         | 57366684         | 14,426         | RPL11 placenta      | Del         | somatic                                   |
| 16        | 81190041         | 81267966         | 77,925         | RPL11 mother        | Del         | n.a.                                      |
| 17        | 46092442         | 46272724         | 180,282        | RPL11 father        | Dupl        | n.a.                                      |
| 19        | 50757732         | 50760253         | 2,521          | RPL11 placenta      | Dupl        | somatic                                   |
| 21        | 15584547         | 15937614         | 353,067        | RPL11 mother        | Dupl        | n.a.                                      |
| 21        | 30720114         | 30866332         | 146218         | RPL11 mother        | Dupl        | n.a.                                      |
| 1         | 10612878         | 10679198         | 66,320         | RPL12 placenta      | Dupl        | somatic                                   |
| 1         | 70542243         | 70553303         | 11,060         | RPL12 father        | Del         | n.a.                                      |
| 2         | 109720215        | 110222769        | 502,554        | RPL12 placenta      | Del         | somatic                                   |
| 2         | 183933099        | 183937882        | 4,783          | RPL12 placenta      | Del         | somatic                                   |
| 2         | 241931649        | 242106609        | 174,960        | RPL12 father        | Del         | n.a.                                      |
| 3         | 19817            | 102299           | 82,482         | RPL12 father        | Dupl        | n.a.                                      |
| 3         | 143447087        | 143476613        | 29,526         | RPL12 father        | Del         | n.a.                                      |
| 3         | 159558237        | 159580247        | 22,010         | RPL12 mother        | Del         | n.a.                                      |
| 3         | 176175294        | 176189554        | 14,260         | RPL12 father        | Del         | n.a.                                      |

|           |                 |                 |                |                    |             |             |
|-----------|-----------------|-----------------|----------------|--------------------|-------------|-------------|
| 4         | 2248382         | 2259993         | 11,611         | RPL12 placenta     | Dupl        | somatic     |
| 4         | 3720680         | 3873507         | 152,827        | RPL12 placenta     | Dupl        | somatic     |
| 4         | 93518875        | 93713151        | 194,276        | RPL12 father       | Del         | n.a.        |
| 5         | 8707907         | 8744445         | 36,538         | RPL12 placenta     | Del         | somatic     |
| 5         | 131681245       | 131740228       | 58,983         | RPL12 placenta     | Del         | somatic     |
| 8         | 103411258       | 103416302       | 5,044          | RPL12 mother       | Del         | n.a.        |
| 9         | 133204076       | 133210396       | 6,320          | RPL12 mother       | Del         | n.a.        |
| 9         | 134393077       | 134411093       | 18,016         | RPL12 placenta     | Dupl        | somatic     |
| 9         | 136606165       | 136624513       | 18,348         | RPL12 placenta     | Dupl        | somatic     |
| 10        | 89184459        | 89185999        | 1,540          | RPL12 placenta     | Del         | somatic     |
| 12        | 31848581        | 31919612        | 71,031         | RPL12 father       | Dupl        | n.a.        |
| 16        | 80857994        | 80910771        | 52,777         | RPL12 placenta     | Del         | somatic     |
| 17        | 46092442        | 46272724        | 180,282        | RPL12 mother       | Dupl        | n.a.        |
| 19        | 15653506        | 15654151        | 645            | RPL12 mother       | Del         | n.a.        |
| 19        | 40850846        | 40873243        | 22,397         | RPL12 placenta     | Del         | somatic     |
| <hr/>     |                 |                 |                |                    |             |             |
| 1         | 3451579         | 3734754         | 283,175        | RPL3 placenta      | Dupl        | somatic     |
| 2         | 238116989       | 238167171       | 50,182         | RPL3 father        | Dupl        | n.a.        |
| 5         | 7178531         | 7190961         | 12,430         | RPL3 mother        | Del         | n.a.        |
| 5         | 97712762        | 97763616        | 50,854         | RPL3 father        | Del         | n.a.        |
| 5         | 97712762        | 97781411        | 68,649         | RPL3 placenta      | Del         | inherited   |
| 6         | 31253262        | 31254137        | 875            | RPL3 father        | Del         | n.a.        |
| 7         | 111252170       | 111383266       | 131,096        | RPL3 father        | Del         | n.a.        |
| 7         | 111252170       | 111385477       | 133,307        | RPL3 placenta      | Del         | inherited   |
| 8         | 5741877         | 5747565         | 5,688          | RPL3 father        | Del         | n.a.        |
| 9         | 126886252       | 126897639       | 11,387         | RPL3 placenta      | Del         | somatic     |
| 16        | 21305426        | 21828019        | 522,593        | RPL3 father        | Del         | n.a.        |
| 16        | 21305426        | 21828019        | 522,593        | RPL3 placenta      | Del         | inherited   |
| 16        | 76886122        | 76981412        | 95,290         | RPL3 mother        | Del         | n.a.        |
| <b>19</b> | <b>27428816</b> | <b>27752973</b> | <b>324,157</b> | <b>RPL3 father</b> | <b>Dupl</b> | <b>n.a.</b> |
| 19        | 46294573        | 46313531        | 18,958         | RPL3 father        | Del         | n.a.        |
| 20        | 15776678        | 15783700        | 7,022          | RPL3 mother        | Del         | n.a.        |

## References to Supplementary Materials

1. Nagirnaja, L. *et al.* Structural Genomic Variation as Risk Factor for Idiopathic Recurrent Miscarriage. *Hum. Mutat.* **35**, 972-82 (2014).
2. Kasak, L., Rull, K., Vaas, P., Teesalu, P. & Laan, M. Extensive load of somatic CNVs in the human placenta. *Sci. Rep.* **5**, 8342 (2015).
3. Sõber, S. *et al.* Extensive shift in placental transcriptome profile in preeclampsia and placental origin of adverse pregnancy outcomes. *Sci. Rep.* **5**, 13336 (2015).
4. Sõber, S. *et al.* RNA sequencing of chorionic villi from recurrent pregnancy loss patients reveals impaired function of basic nuclear and cellular machinery. *Sci. Rep.* **6**, 38439 (2016).
5. Reimand, J., Kull, M., Peterson, H., Hansen, J. & Vilo, J. g:Profiler--a web-based toolset for functional profiling of gene lists from large-scale experiments. *Nucleic Acids Res.* **35**, W193-200 (2007).
